# Supplementary material for: Optimization of charge carrier transport balance for performance improvement of PDPP3T-based polymer solar cells prepared using a hot solution
Source: Royal Society of Chemistry journal article supplement (doi:10.1039/c5cp00963d), 2015-01-01
Supplement: c5cp00963d1.pdf [file c5cp00963d1.pdf]

## Supplementary Materials

### Optimization of charge carrier transport balance for performance improvement of PDPP3T-based polymer solar cells prepared from hot solution

Jian Wang<sup>a</sup>, Fujun Zhang<sup>a,\*</sup>, Miao Zhang<sup>a</sup>, Wenbin Wang<sup>a</sup>, Qiaoshi An,<sup>a</sup> Lingliang Li<sup>a</sup>,  
Qianqian Sun<sup>a</sup>, Weihua Tang<sup>b</sup>, Jian Zhang<sup>c</sup>

<sup>a</sup> Key Laboratory of Luminescence and Optical Information, Ministry of Education, Beijing Jiaotong University, Beijing 100044, People's Republic of China

<sup>b</sup> Key Laboratory of Soft Chemistry and Functional Materials (Ministry of Education of China), Nanjing University of Science and Technology, Nanjing 210094, People's Republic of China

<sup>c</sup> School of Materials Science and Engineering, Guilin University of Electronic Technology, 541004, China

A conventional PSCs structure of ITO/PEDOT:PSS/PDPP3T:PC<sub>71</sub>BM/LiF (1 nm)/Al (100 nm) was used in this work. The PDPP3T:PC<sub>71</sub>BM (1:2, Wt/Wt) active layers were prepared from cool solution, cool solution processed with DIO (5%, v/v) and hot solution (70 °C), respectively. The thickness of PDPP3T:PC<sub>71</sub>BM blend films was adjusted by changing spin-coating speed to obtain the optimized PCE of each kind of PSCs. The *J-V* characteristics curves of the all PSCs prepared from different solutions and spin-coating speeds were measured under AM 1.5 illumination at 100 mW/cm<sup>2</sup> and are shown in Fig. S1. The key photovoltaic parameters of PSCs according to the *J-V* curves were summarized and are shown in Table S1.

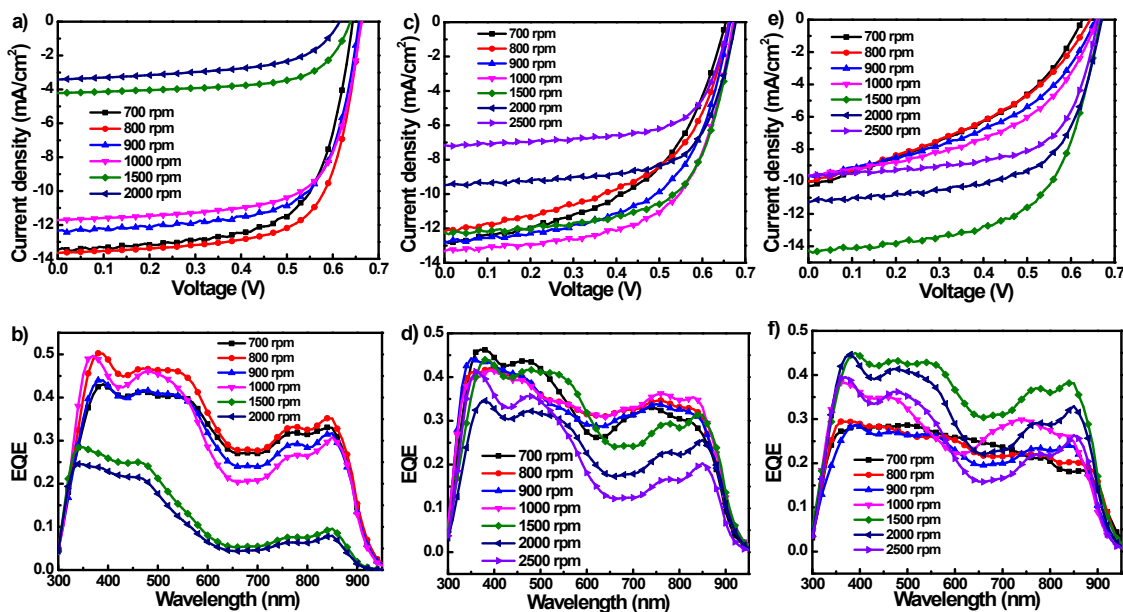

\* Corresponding author: [fjzhang@bjtu.edu.cn](mailto:fjzhang@bjtu.edu.cn) (Fujun), Tel: 0086-10-51684908

Fig.S1  $J$ - $V$  curves and EQE spectra of the PSCs prepared from different solutions: a), b) hot solution (70 °C); c), d) cool solution; e), f) cool solution processed with DIO (5%, v/v).

Table S1 Key performance parameters of PSCs prepared from different solutions

| <b>Rpm</b>  | <b>Solution</b> | <b>V<sub>oc</sub> (V)</b> | <b>J<sub>sc</sub> (mA/cm<sup>2</sup>)</b> | <b>FF (%)</b> | <b>PCE (%)</b> |
|-------------|-----------------|---------------------------|-------------------------------------------|---------------|----------------|
| <b>700</b>  | <b>Cool</b>     | <b>0.65</b>               | <b>12.75</b>                              | <b>51.8</b>   | <b>4.29</b>    |
|             | <b>DIO</b>      | <b>0.63</b>               | <b>10.28</b>                              | <b>39.1</b>   | <b>2.53</b>    |
|             | <b>Hot</b>      | <b>0.65</b>               | <b>12.99</b>                              | <b>66.4</b>   | <b>5.61</b>    |
| <b>800</b>  | <b>Cool</b>     | <b>0.66</b>               | <b>12.16</b>                              | <b>52.6</b>   | <b>4.22</b>    |
|             | <b>DIO</b>      | <b>0.64</b>               | <b>9.98</b>                               | <b>39.4</b>   | <b>2.52</b>    |
|             | <b>Hot</b>      | <b>0.66</b>               | <b>13.65</b>                              | <b>69.0</b>   | <b>6.22</b>    |
| <b>900</b>  | <b>Cool</b>     | <b>0.66</b>               | <b>12.82</b>                              | <b>58.4</b>   | <b>4.94</b>    |
|             | <b>DIO</b>      | <b>0.66</b>               | <b>9.66</b>                               | <b>43.6</b>   | <b>2.78</b>    |
|             | <b>Hot</b>      | <b>0.66</b>               | <b>12.33</b>                              | <b>67.3</b>   | <b>5.48</b>    |
| <b>1000</b> | <b>Cool</b>     | <b>0.67</b>               | <b>13.32</b>                              | <b>62.0</b>   | <b>5.54</b>    |
|             | <b>DIO</b>      | <b>0.66</b>               | <b>9.62</b>                               | <b>48.3</b>   | <b>3.07</b>    |
|             | <b>Hot</b>      | <b>0.66</b>               | <b>11.71</b>                              | <b>68.9</b>   | <b>5.32</b>    |
| <b>1500</b> | <b>Cool</b>     | <b>0.68</b>               | <b>12.24</b>                              | <b>64.5</b>   | <b>5.37</b>    |
|             | <b>DIO</b>      | <b>0.67</b>               | <b>14.27</b>                              | <b>61.2</b>   | <b>5.85</b>    |
|             | <b>Hot</b>      | <b>0.64</b>               | <b>4.22</b>                               | <b>64.3</b>   | <b>1.74</b>    |
| <b>2000</b> | <b>Cool</b>     | <b>0.65</b>               | <b>9.64</b>                               | <b>66.7</b>   | <b>4.18</b>    |
|             | <b>DIO</b>      | <b>0.64</b>               | <b>12.22</b>                              | <b>65.4</b>   | <b>5.12</b>    |
|             | <b>Hot</b>      | <b>0.62</b>               | <b>3.42</b>                               | <b>55.8</b>   | <b>1.18</b>    |
| <b>2500</b> | <b>Cool</b>     | <b>0.64</b>               | <b>8.49</b>                               | <b>68.0</b>   | <b>3.64</b>    |
|             | <b>DIO</b>      | <b>0.64</b>               | <b>10.4</b>                               | <b>66.1</b>   | <b>4.40</b>    |
|             | <b>Hot</b>      | <b>-</b>                  | <b>-</b>                                  | <b>-</b>      | <b>-</b>       |
